# Supplementary material for: A natural in situ fabrication method of functional bacterial cellulose using a microorganism
Source: PubMed Central journal article supplement (PMC6347598; doi:10.1038/s41467-018-07879-3), 2019-01-25
Supplement: 41467_2018_7879_MOESM1_ESM.pdf [file 41467_2018_7879_MOESM1_ESM.pdf]

## **Supplementary Information**

**A natural *in situ* fabrication method of functional  
bacterial cellulose using a microorganism**

**Gao et al**

## Supplementary Figure 1

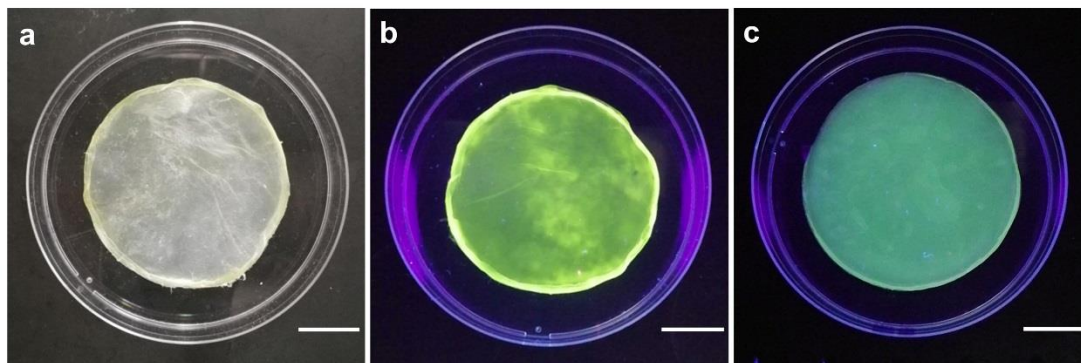

**Supplementary Figure 1** Images of Ch-6CF/BC and HC-6CF-BC samples. **a**, The image of Ch-6CF/BC observed under white light. **b-c**, The images of different BC samples observed under ultraviolet light (365 nm). Green fluorescence was observed on both **(b)** Ch-6CF/BC and **(c)** HC-6CF-BC, whereas the fluorescence distribution of HC-6CF-BC was more uniform than that of Ch-6CF/BC. The scale bar corresponds to 2 cm.

**Supplementary Figure 2**

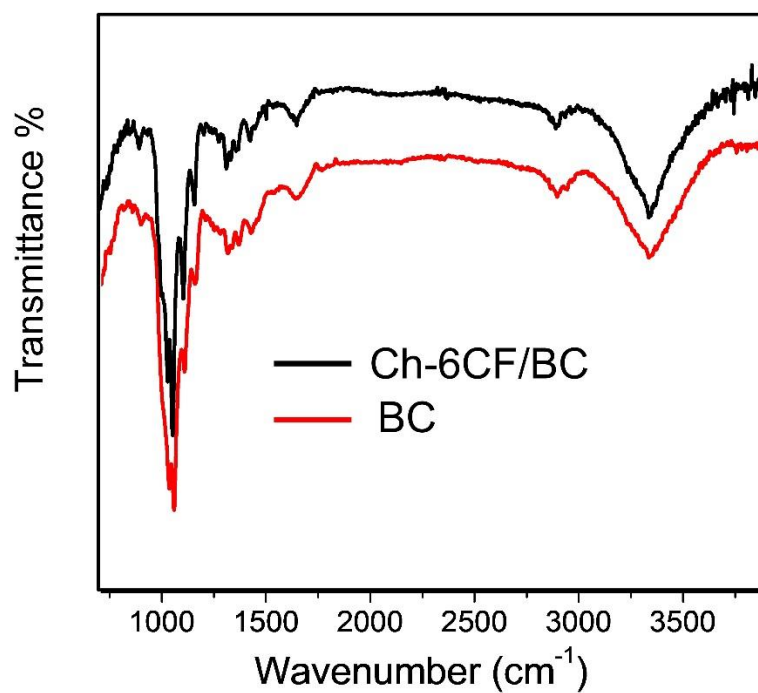

**Supplementary Figure 2** FT-IR ATR spectra of Ch-6CF/BC and BC. The spectra showed that the absorption peaks of Ch-6CF/BC (black) were the same as those of BC (red), and no characteristic absorption peaks appeared at 1740 cm<sup>-1</sup> (C=O stretching in ester). The result revealed that no ester bonds were formed on Ch-6CF/BC, indicating that 6CF was physically adsorbed on the BC.

### Supplementary Figure 3

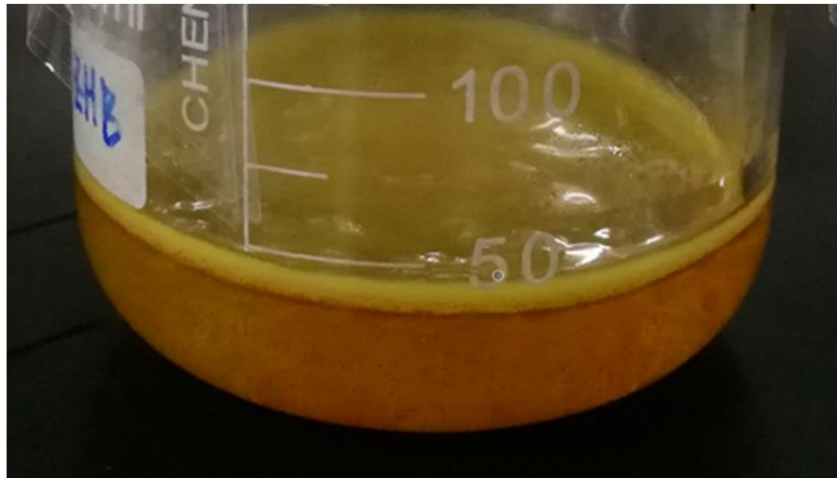

**Supplementary Figure 3** A photo of BC sample produced by *K. sucrofermentans* cultivated in H-S medium supplemented with 6CF. *K. sucrofermentans* was cultivated in H-S fermentation medium supplemented with 6CF (50 mg) under standard conditions (30°C, 5 days). A complete BC film was obtained on the surface of the culture medium, indicating that 6CF had no clear impact on the growth and metabolism of *K. sucrofermentans*.

#### Supplementary Figure 4

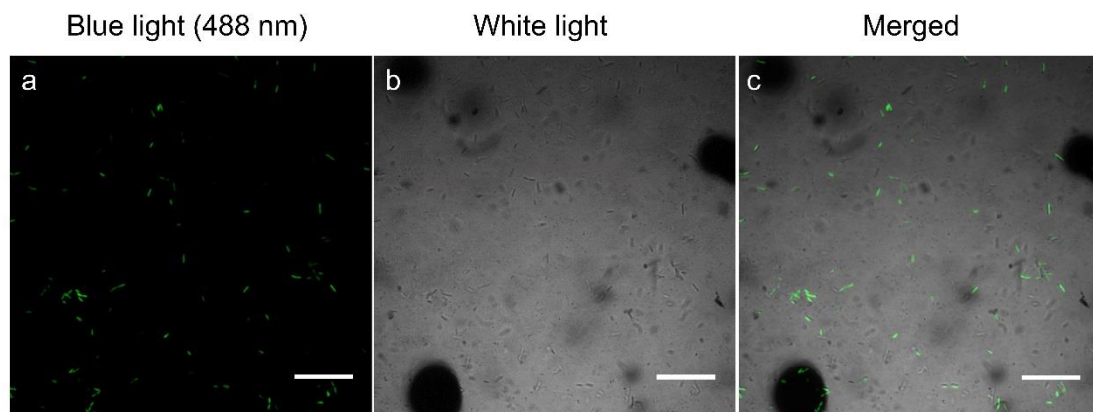

**Supplementary Figure 4** CLSM observation. CLSM images (emission wavelength, 488 nm) of BC samples produced by cultivating *K. sucrofermentans* in H-S fermentation medium supplemented with 6CF under standard conditions. **a**, Blue light, 488 nm. **b**, White light. **c**, Merged. Green fluorescence was observed on a part of *K. sucrofermentans*, demonstrating that 6CF could enter the cell body of *K. sucrofermentans*. The scale bar corresponds to 20  $\mu\text{m}$ .

## Supplementary Figure 5

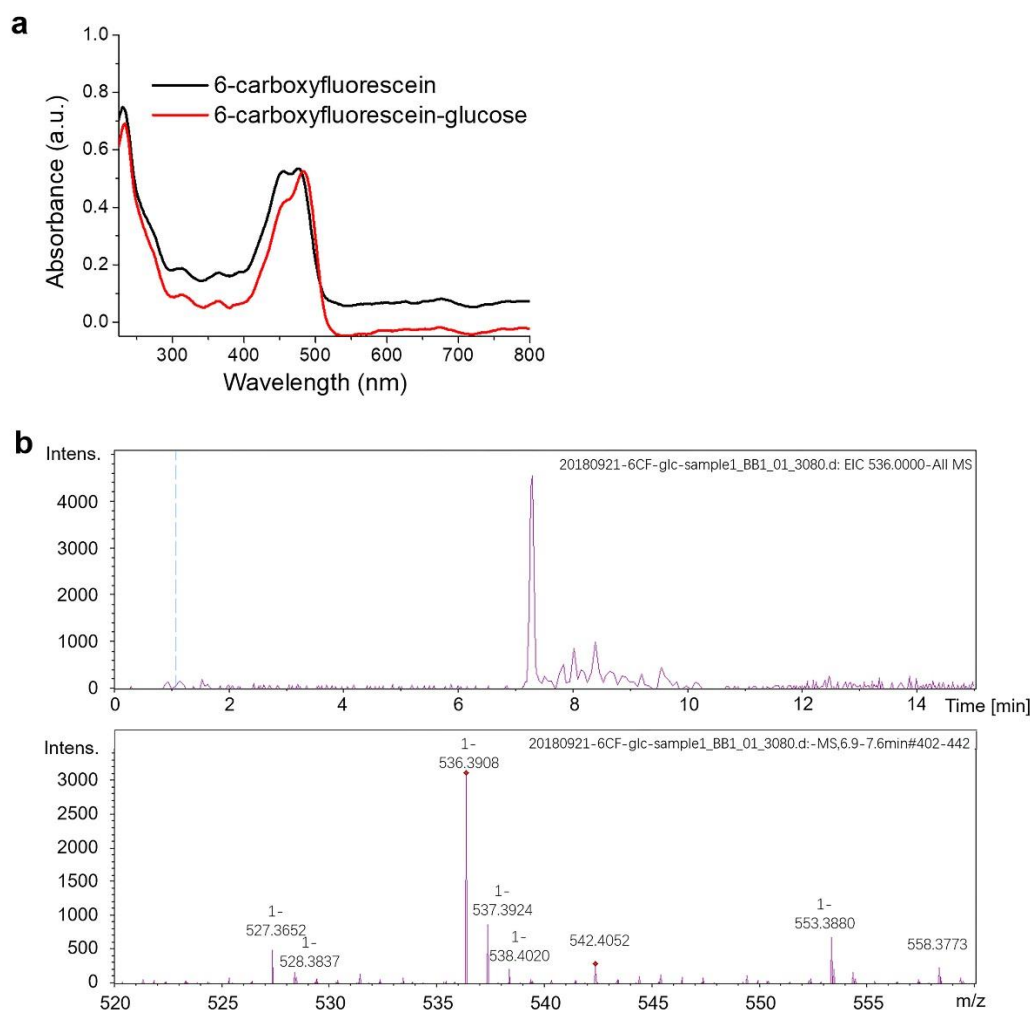

**Supplementary Figure 5** Characteristic analysis of 6CF and 6CF-Glc. **a**, UV-Vis spectra measured in distilled water, pH 6. Black line: 6-carboxyfluorescein with bands at 231/455/477 nm. Red line: 6CF-Glc with bands at 232/457/481 nm. The observed peak with a slight redshift demonstrated the conjugation of 6-carboxyfluorescein to glucose. **b**, LC-ESI-MS spectra ( $m/z$ ,  $\text{CH}_3\text{CN}/\text{formic acid } 0.1\%$ ): found 536.39 [M-H]<sup>-</sup>. <sup>1</sup>H NMR (600 MHz,  $\text{CD}_3\text{OD}$ )  $\delta$  (ppm): 8.15 (dd,  $J = 8.04, 1.68$  Hz, 1H), 8.01 (d,  $J = 8.04$ , 1H), 7.80 (d,  $J = 1.56$ , 1H), 7.09 (d,  $J = 9.18$ , 2H), 6.55-6.61 (m, 5H), 6.16 (dd,  $J = 17.40, 10.20$  Hz, 1H), 6.04 (dd,  $J = 17.40, 2.34$  Hz, 1H), 5.50 (dd,  $J = 10.20, 2.28$  Hz, 1H), 3.55 (m, 1H), 3.18 (m, 2H).

## Supplementary Figure 6

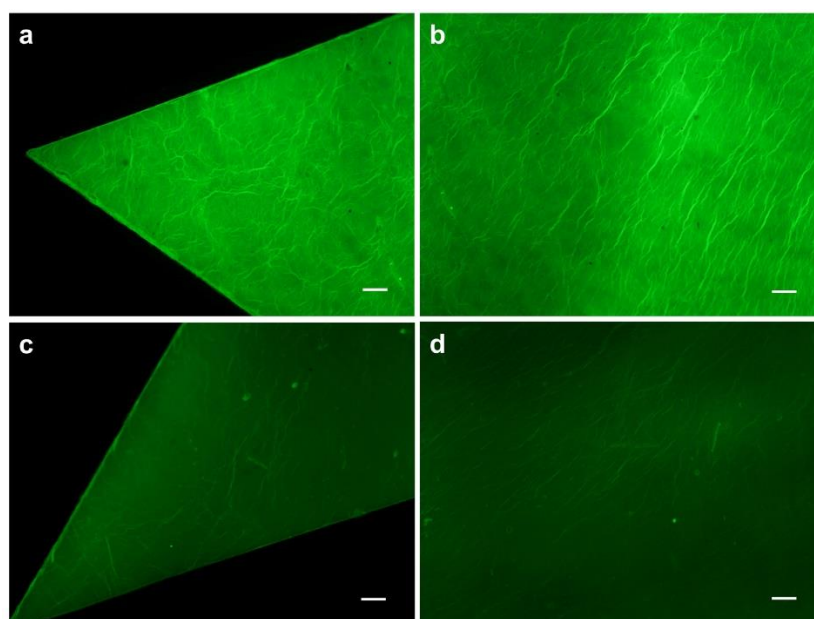

**Supplementary Figure 6** Fluorescence observation of HC-6CF-BC and LC-6CF-BC with a fluorescence microscopy. **a-b**, represent two different fields of view of HC-6CF-BC. **c-d**, represent two different fields of view of LC-6CF-BC. The fluorescent signal of (**a, b**) HC-6CF-BC was stronger than that of (**c, d**) LC-6CF-BC. The scale bar corresponds to 200  $\mu\text{m}$ .

### Supplementary Figure 7

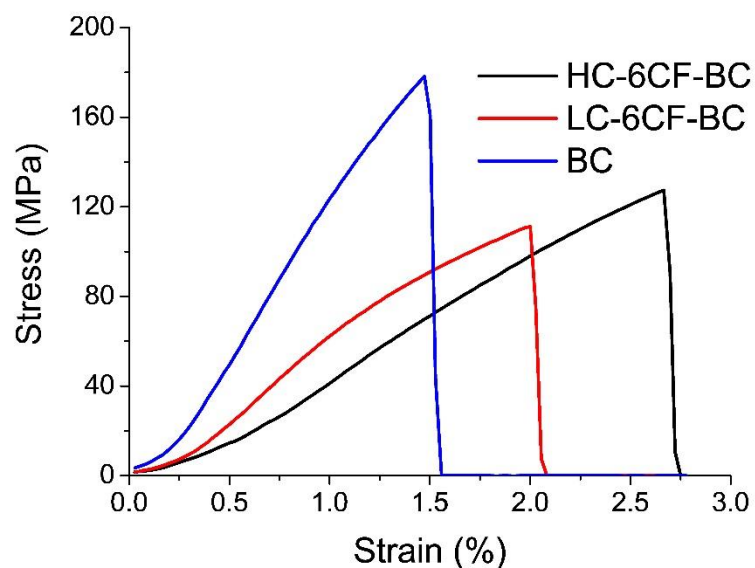

**Supplementary Figure 7** Stress-strain graphs of different BC samples. The width and thickness of samples was measured using a Vernier caliper and the cross-sectional SEM images of samples (Fig. 5g-i). The 6CF-BC (black and red) had a lower elastic modulus and tensile strength than BC (blue). Concomitantly, HC-6CF-BC showed the highest values of elongation at the break. The results demonstrated that the introduction of 6CF influenced the mechanical properties of BC.



**Supplementary Table 1**

| Sample    | Elastic Modulus (MPa) | Elongation at break (%) | Tensile strength (MPa) |
|-----------|-----------------------|-------------------------|------------------------|
| HC-6CF-BC | 9315.10 ± 315.22      | 2.77 ± 0.21             | 134.56 ± 21.65         |
| LC-6CF-BC | 8183.62 ± 445.36      | 2.08 ± 0.35             | 115.94 ± 35.87         |
| BC        | 13409.94 ± 558.77     | 1.57 ± 0.48             | 189.89 ± 29.55         |

**Supplementary Table 1** Mechanical properties of different BC samples. For each sample, at least 6 individual samples were measured to calculate a mean value. Data are expressed as means ± s.d.
